# Supplementary material
Source: PubMed Central journal article supplement (PMC7646063)
Supplement: 40545_2020_273_MOESM3_ESM.pdf [file 40545_2020_273_MOESM3_ESM.pdf]

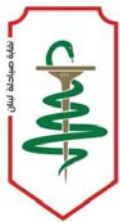

January 11, 2018

## PRESCRIPTION FORMAT AMENDMENTS

The below suggestions would improve the functionality of the unified prescription:

1. Triplicate prescription form:
  - First paper: white color paper (no carbon-copy), written and stamped by the physician and filed by the pharmacist.
  - Second paper: duplicate white color carbon copy paper holding the mention "DUPLICATE. NOT SUITABLE FOR DISPENSING", written and stamped by the physician and used by the patient to get reimbursed by third party payers.
  - Third paper: triplicate and carbon copy of the duplicate (2<sup>nd</sup> paper), any color, to be filed by the physician.
2. Add important missing fields as available through the Lebanese Advanced Patient Profile:
  - Change the serial number of the prescription to a QR code (for a better security and confidentiality)  

  - Gender
  - Age
  - Diagnosis
3. The laboratory part should be on a separate unnumbered\* form, to be developed by the "Syndicat des Biologistes au Liban" with the collaboration of the MOPH.
4. The medical report should be written on a separate unnumbered\* form, to be developed by the "Lebanese Order of Physicians" with the collaboration of the MOPH.

*\* This would prevent the physician from paying taxes twice or more for the same patient.*
